# Supplementary material for: Synthesis of silsesquioxane urethane hybrid materials by a modified sol–gel process
Source: Royal Society of Chemistry journal article supplement (doi:10.1039/c5nj00960j), 2015-01-01
Supplement: c5nj00960j1.pdf [file c5nj00960j1.pdf]

Electronic Supplementary Information (ESI) for New Journal of Chemistry.

Supplementary Information

A Silsesquioxane-Urethane Type of Hybrid Material  
 Synthesized by Modified Sol-Gel Process

Sizhe Wang,<sup>a</sup> Guangli Li,<sup>a</sup> John J. Chiao,<sup>b</sup> Z. Jeffrey Wang<sup>b\*</sup> and Yanwen Yvonne Duan<sup>a\*</sup>

<sup>a</sup> College of Chemistry and Molecular Sciences, Wuhan University, Wuhan, 430072 Hubei, P.R. China

<sup>b</sup> NEO-SITECH Enterprises Limited, 495 Plainfield Ave. Berkeley Heights, NJ 07922 USA

\* Corresponding author. Tel.: +86 027 68752858; Fax: +86 027 68753383; E-mail address: yduan@whu.edu.cn (Yanwen Yvonne Duan).

**Table S1** Composition assignments of the main peaks (relative intensities above 20%) in the ESI mass spectrum for IPDI-HEA

| m/z exp. | Possible structures                                                                 | Ion species         | m/z calc. | Mass errors |
|----------|-------------------------------------------------------------------------------------|---------------------|-----------|-------------|
| 313.1843 | 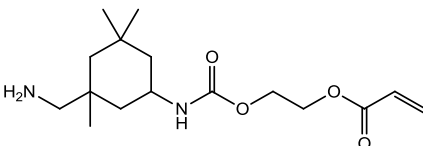  | [M+H] <sup>+</sup>  | 313.2122  | -0.009%     |
| 339.3028 |  | [M+H] <sup>+</sup>  | 339.1915  | 0.033%      |
| 419.3319 |  | [M+H] <sup>+</sup>  | 419.3017  | 0.007%      |
| 455.3152 |  | [M+H] <sup>+</sup>  | 455.2388  | 0.017%      |
| 477.2384 |  | [M+Na] <sup>+</sup> | 477.2207  | 0.004%      |
| 535.4782 |  | [M+H] <sup>+</sup>  | 535.3490  | 0.024%      |
| 651.5578 |  | [M+H] <sup>+</sup>  | 651.3964  | 0.025%      |

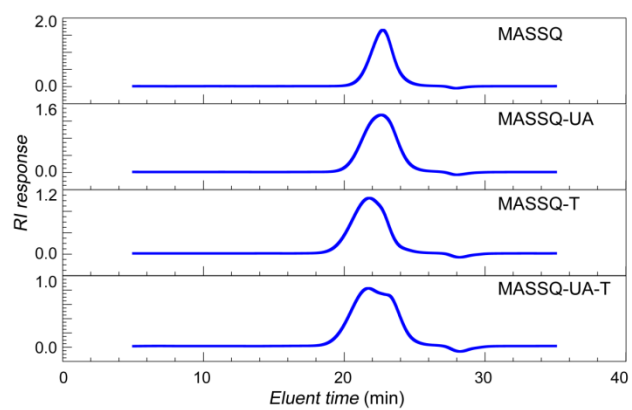

**Fig. S1** GPC traces of the MASSQ, MASSQ-UA, MASSQ-T, MASSQ-UA-T. MASSQ-T and MASSQ-UA-T are the samples of MASSQ and MASSQ-UA after keeping at 65 °C for 7 days.

---

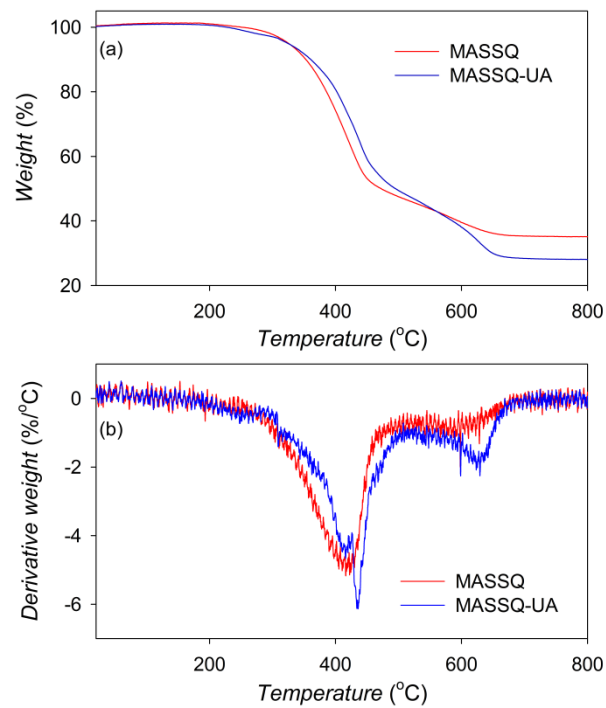

**Fig. S2** TG (a) and DTG (b) curves of MASSQ and MASSQ-UA at a heating rate of 10 °C/min in air.
